# Supplementary material for: Exploring the Antiproliferative and Modulatory Effects of 1-Methoxyisobrassinin on Ovarian Cancer Cells: Insights into Cell Cycle Regulation, Apoptosis, Autophagy, and Its Interactions with NAC
Source: MDPI journal article supplement (doi:10.3390/molecules29081773), 2024-04-13
Supplement: s1 [file s1]

# Exploring the Antiproliferative and Modulatory Effects of 1-Methoxyisobrassinin on Ovarian Cancer Cells: Insights into Cell Cycle Regulation, Apoptosis, Autophagy, and Its Interactions with NAC

Martina Zigová <sup>1</sup>, Viktória Miškufová <sup>1</sup>, Marianna Budovská <sup>2</sup>, Radka Michalková <sup>1,\*</sup> and Ján Mojžiš <sup>1,\*</sup>

<sup>1</sup> Department of Pharmacology, Faculty of Medicine, Pavol Jozef Šafárik University, 040 01 Košice, Slovakia; chripkova.martina@gmail.com (M.Z.); viktoria.miskufova@student.upjs.sk (V.M.)

<sup>2</sup> Department of Organic Chemistry, Institute of Chemistry, Faculty of Science, Pavol Jozef Šafárik University, 040 01 Košice, Slovakia; marianna.budovska@upjs.sk

\* Correspondence: radka.michalkova@upjs.sk (R.M.); jan.mojzis@upjs.sk (J.M.)

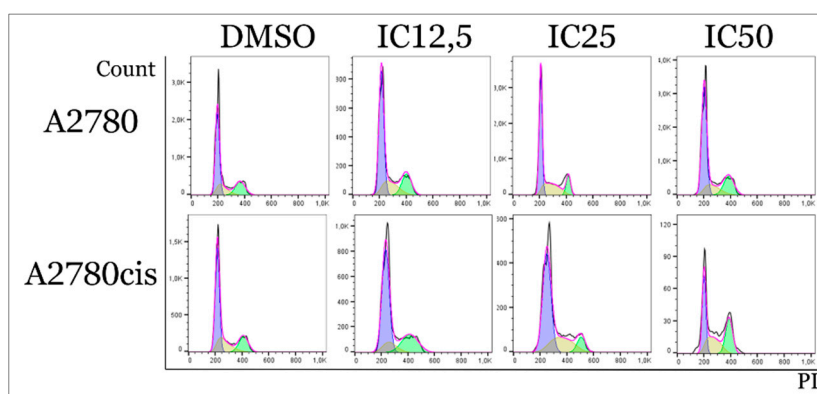

**Figure S1.** Representative histograms of cell cycle distribution in A2780 and A2780cis cells treated with MB-591 at concentrations of IC12.5, IC25 and IC50 after 72 h.

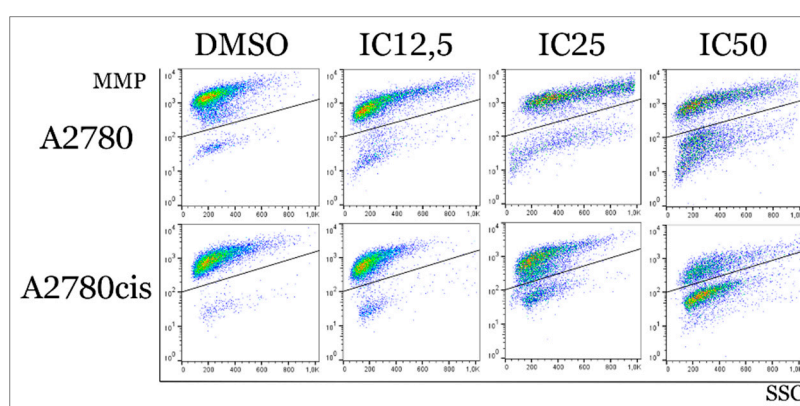

**Figure S2.** Representative dot-blot diagrams of changes in MMP in A2780 and A2780cis cells after 72h treatment with MB-591 at IC12.5, IC25 and IC50 concentrations.

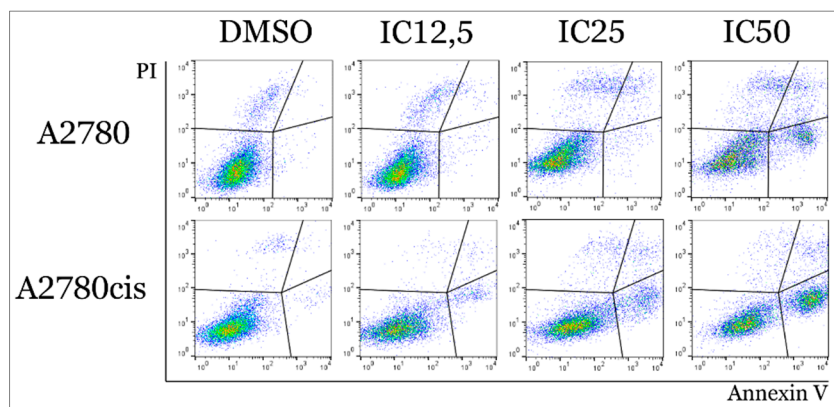

*Figure S3.* Representative dot-blot diagrams of Annexin V/PI staining in A2780 and A2780cis cells after 72h treatment with with MB-591 at IC12.5, IC25 and IC50 concentrations.

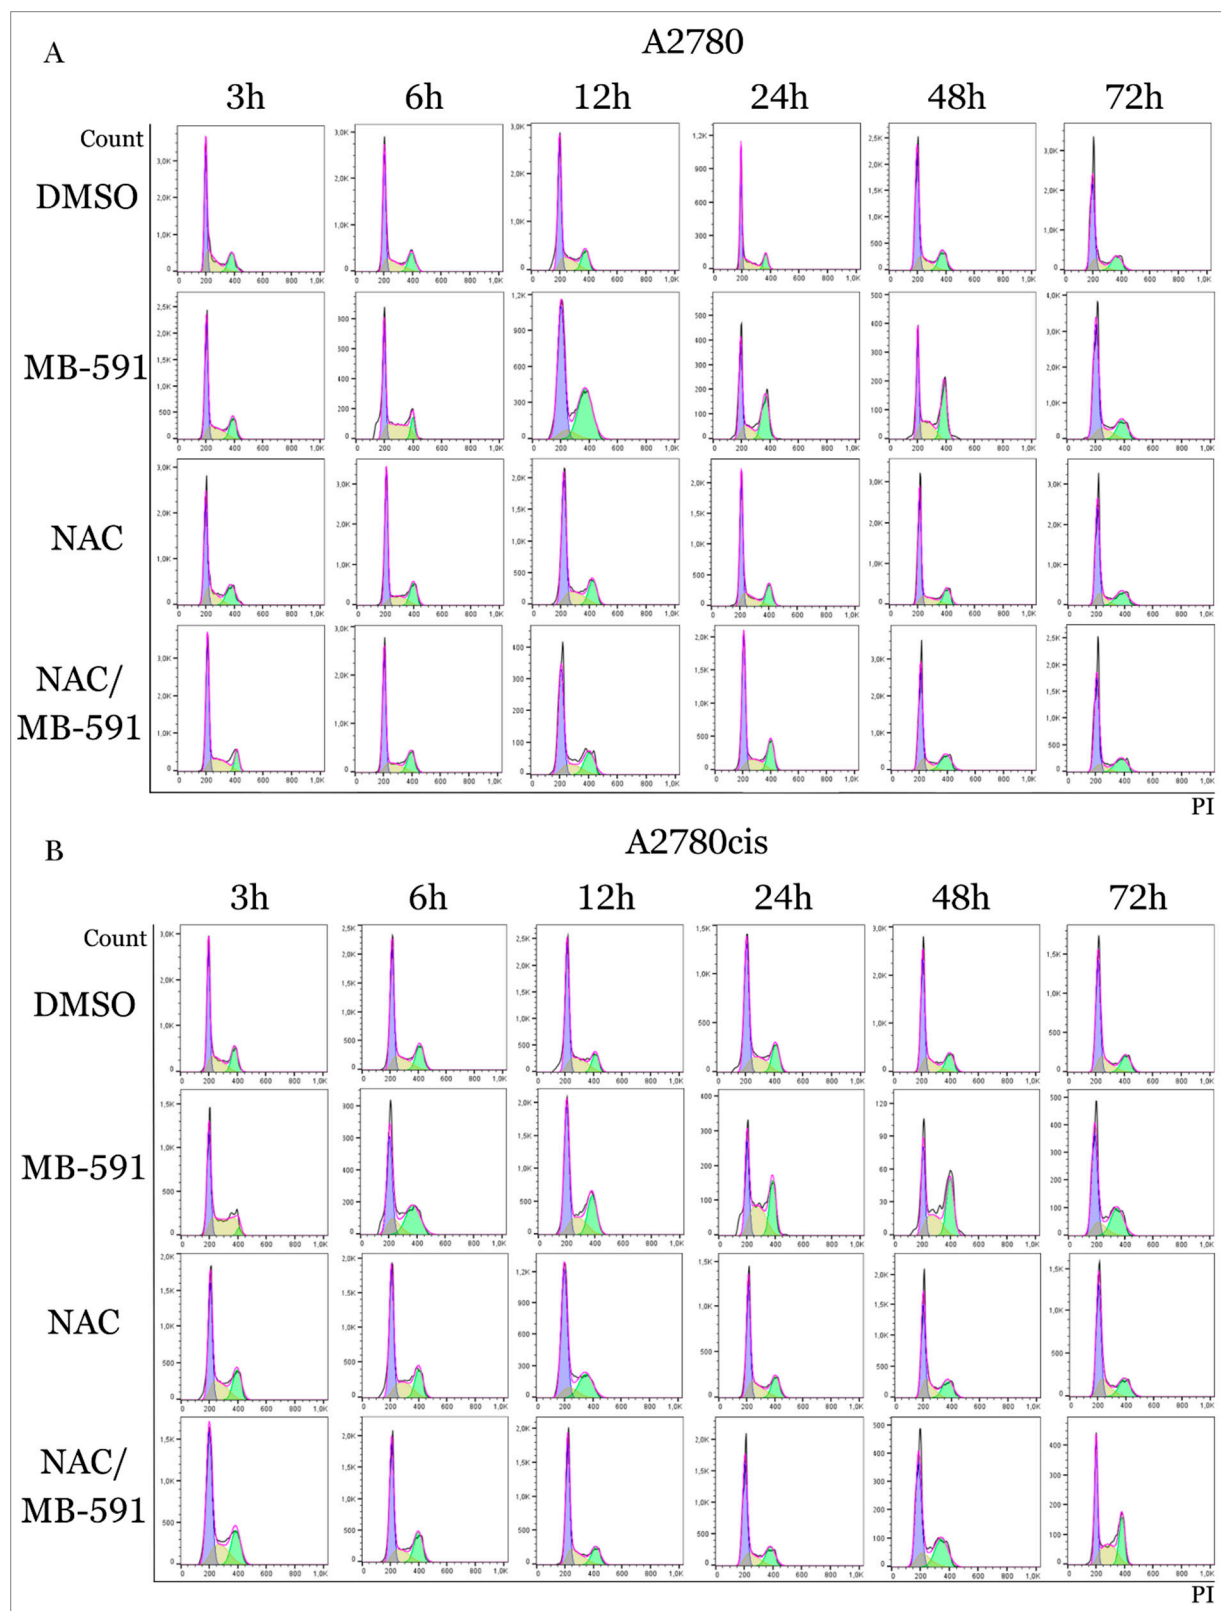

**Figure S4.** Representative histograms of cell cycle distribution in A2780 (**A**) and A2780cis (**B**) cells treated with MB-591, NAC and NAC/MB-591 after 3, 6, 12, 24, 48 and 72h.

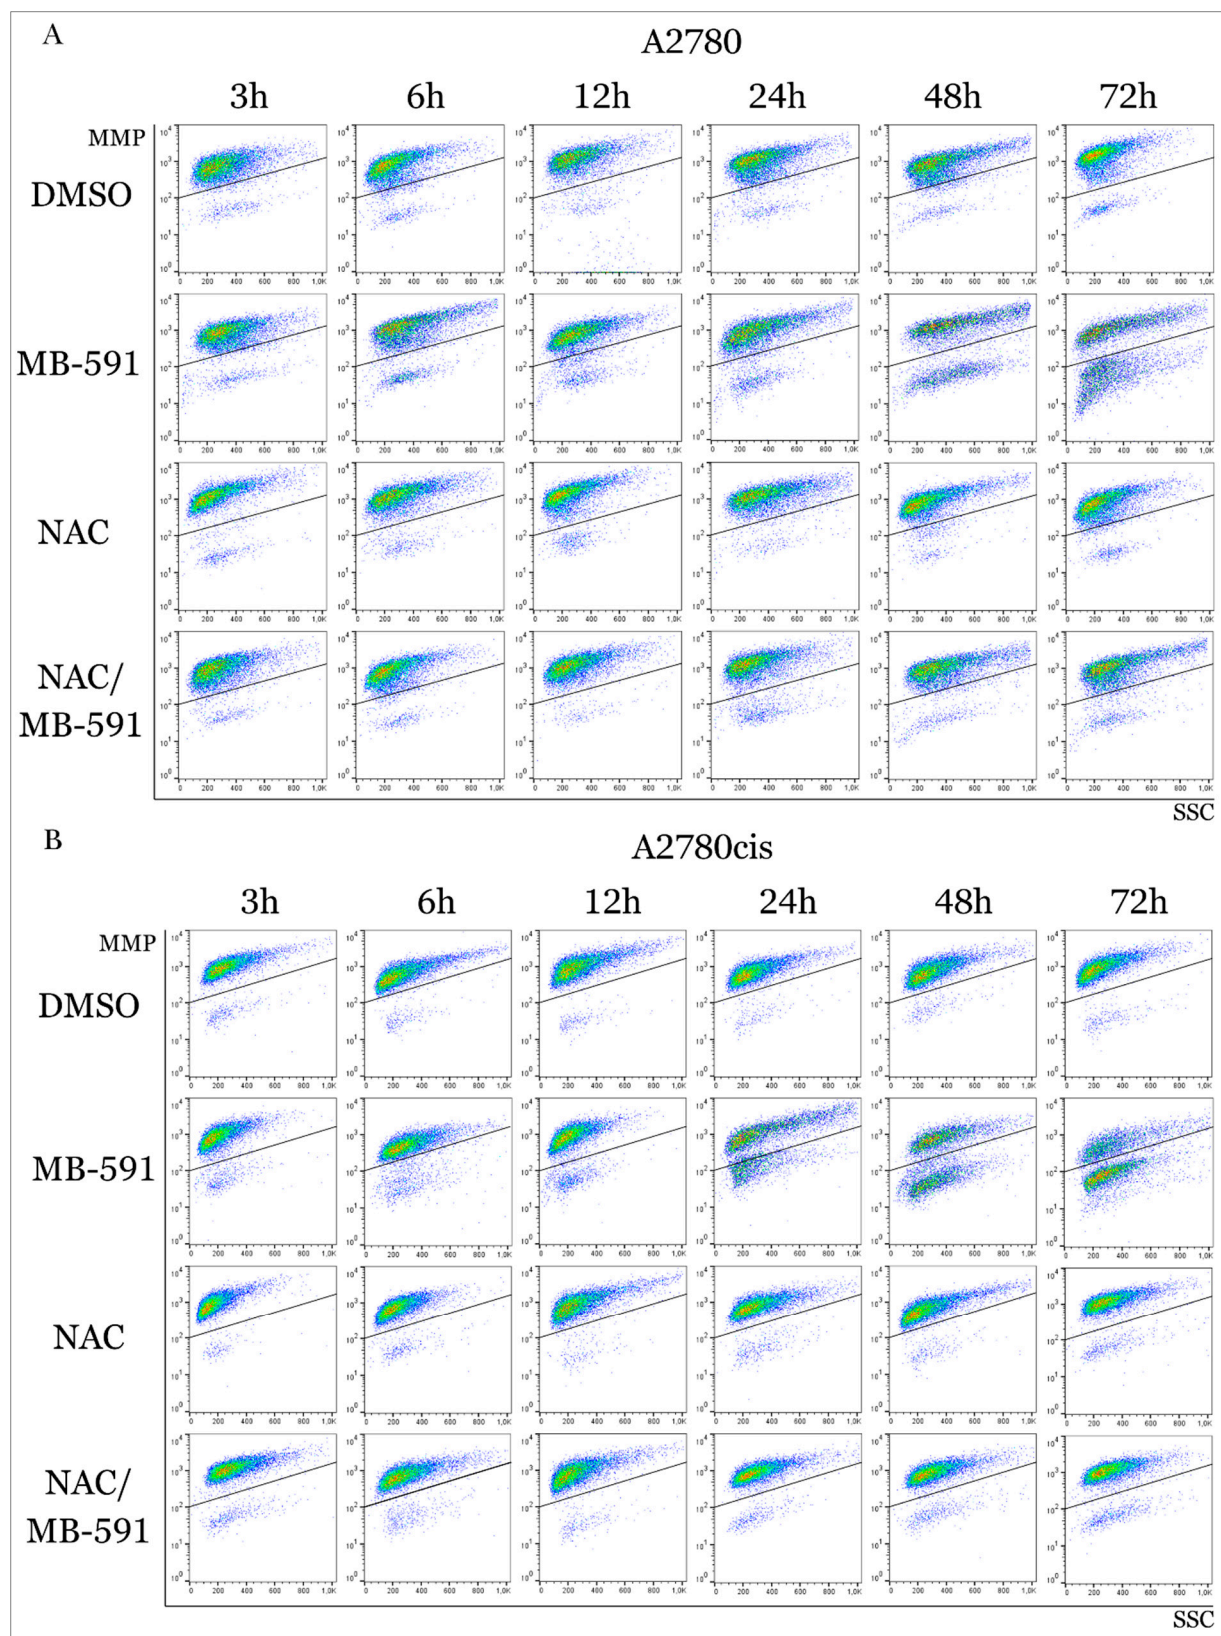

**Figure 55.** Representative dot-blot diagrams of changes in MMP in A2780 (A) and A2780cis (B) cells treated with MB-591 at concentration of IC<sub>50</sub>, NAC and NAC/MB-591 after 3, 6, 12, 24, 48 and 72h of incubation.



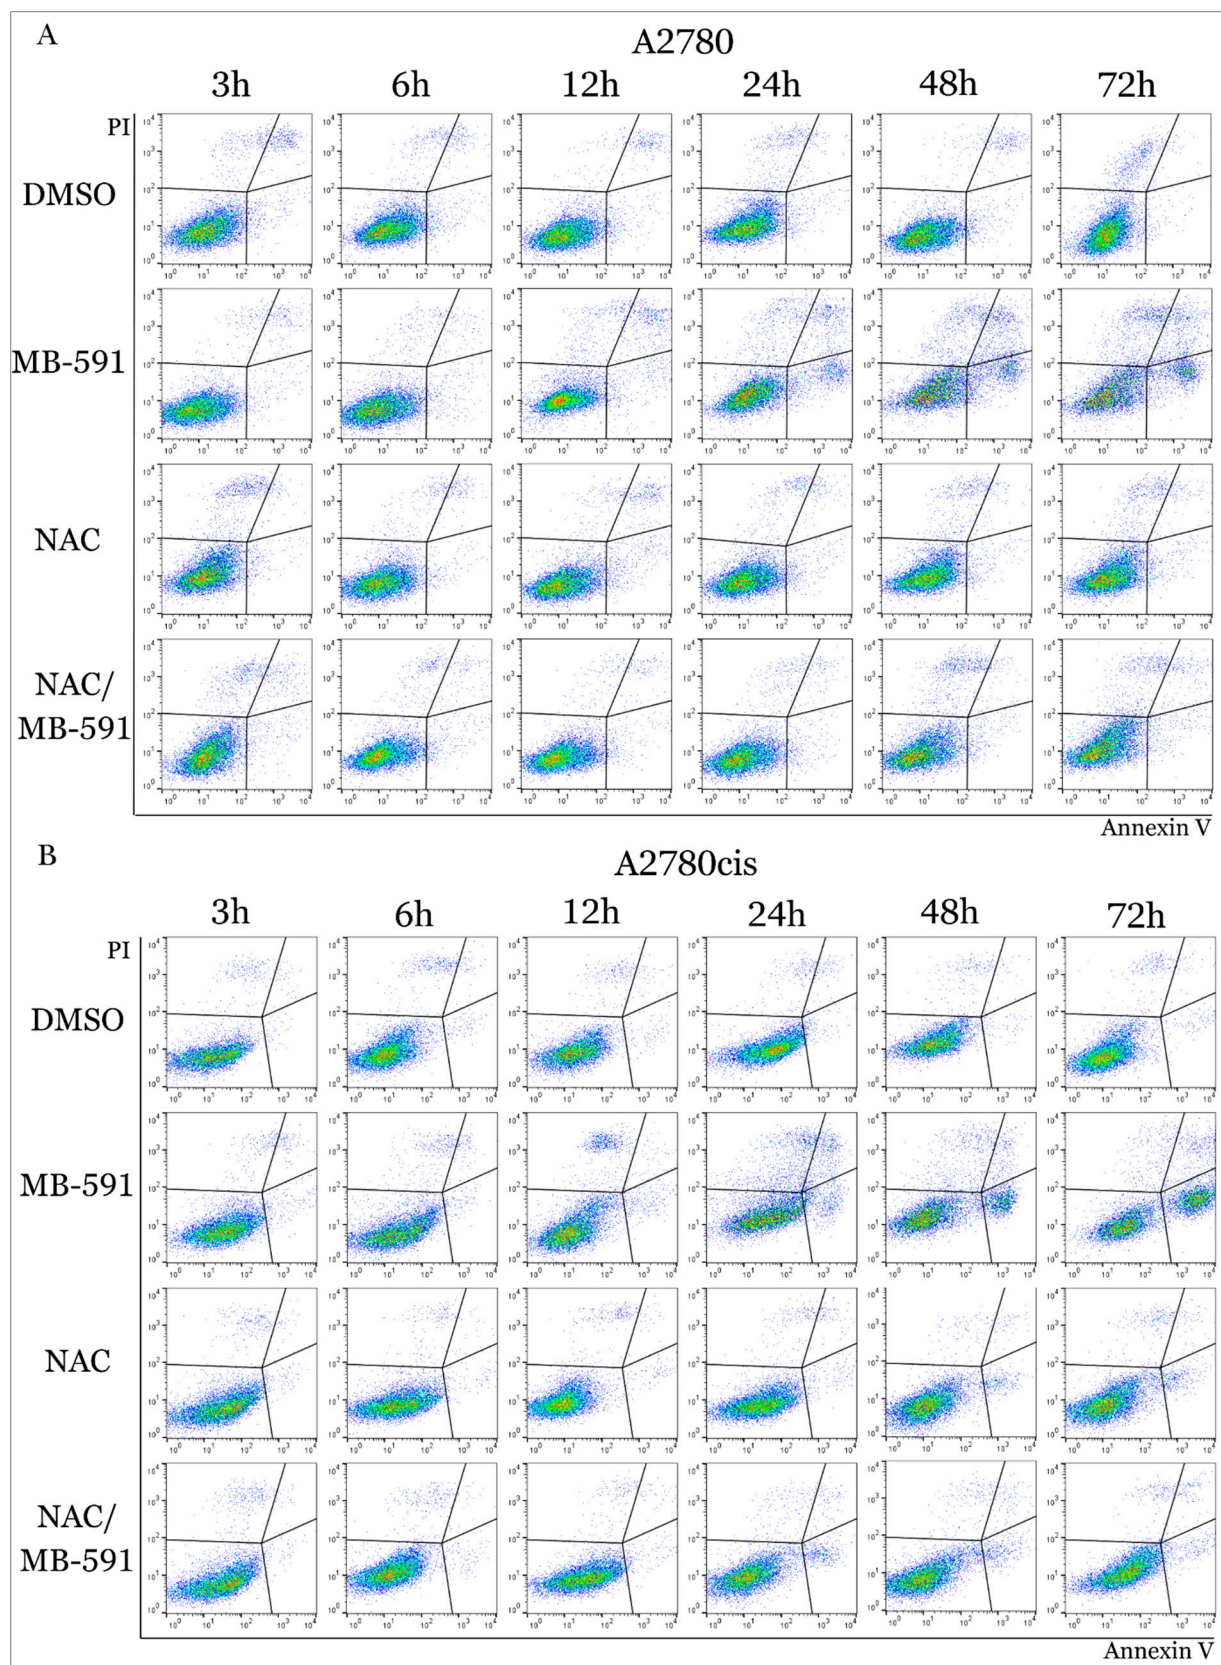

**Figure S6.** Representative dot-blot diagrams of Annexin V/PI staining in A2780 (A) and A2780cis (B) cells after treatment with MB-591 at concentration of IC<sub>50</sub>, NAC and NAC/MB-591 after 3, 6, 12, 24, 48 and 72h.
